# Supplementary material
Source: MDPI journal article supplement (https://www.mdpi.com/2075-163X/12/11/1461)
Supplement: s1 [file s1]

**Supplementary Table.** Trace element data (ppm) of scheelite from the Shimensi tungsten deposit.

| Element | DHT91  |        |        |        |        |        | DHT96  |        |        |        |        |        | DHT198 |        |        |        |        |        |
|---------|--------|--------|--------|--------|--------|--------|--------|--------|--------|--------|--------|--------|--------|--------|--------|--------|--------|--------|
|         | 1      | 2      | 3      | 4      | 5      | 6      | 1      | 2      | 3      | 4      | 5      | 6      | 7      | 8      | 9      | 10     | 1      | 2      |
| Ti      | 0.78   | 0.68   | 2.79   | 0.43   | 0.36   | 0.57   | --     | 0.20   | 0.10   | --     | --     | 0.15   | 0.23   | 0.18   | 0.35   | 0.15   | 0.13   | --     |
| Sr      | 65.36  | 62.02  | 63.42  | 94.96  | 120.80 | 102.79 | 365.82 | 285.88 | 426.69 | 329.45 | 357.89 | 330.71 | 367.93 | 460.06 | 196.03 | 419.36 | 270.82 | 300.70 |
| Y       | 532.92 | 774.43 | 802.65 | 676.20 | 177.57 | 732.29 | 120.63 | 124.59 | 87.53  | 140.12 | 114.05 | 124.02 | 124.82 | 94.78  | 167.17 | 137.05 | 174.46 | 201.88 |
| Nb      | 27.30  | 30.06  | 34.98  | 95.07  | 49.55  | 72.96  | 4.91   | 3.87   | 2.65   | 3.26   | 2.57   | 2.66   | 9.53   | 2.45   | 5.70   | 14.72  | 2.99   | 3.89   |
| Mo      | 2.59   | 3.49   | 3.10   | 294.40 | 2.43   | 259.24 | 107.53 | 123.79 | 143.81 | 132.68 | 156.16 | 138.72 | 108.20 | 163.74 | 150.54 | 156.55 | 149.29 | 142.03 |
| Ba      | 0.09   | 0.28   | 0.05   | 0.06   | 0.13   | 0.12   | 0.14   | 0.16   | 0.15   | 0.12   | 0.14   | 0.52   | 0.14   | 0.13   | 0.55   | 0.08   | 0.04   | 0.05   |
| La      | 83.05  | 60.37  | 63.71  | 151.27 | 55.32  | 165.75 | 65.90  | 70.19  | 83.99  | 84.14  | 79.27  | 74.34  | 56.95  | 74.91  | 96.62  | 95.77  | 107.63 | 126.86 |
| Ce      | 325.10 | 299.43 | 307.65 | 459.94 | 136.19 | 489.20 | 140.39 | 149.10 | 142.07 | 167.06 | 147.08 | 150.63 | 137.81 | 125.18 | 187.82 | 152.35 | 282.20 | 311.58 |
| Pr      | 43.78  | 53.56  | 54.99  | 61.89  | 16.23  | 61.22  | 17.37  | 17.30  | 13.12  | 18.55  | 15.73  | 16.98  | 19.12  | 12.47  | 20.45  | 15.07  | 36.50  | 37.55  |
| Nd      | 161.38 | 284.29 | 301.33 | 296.27 | 63.70  | 281.31 | 71.81  | 66.25  | 40.03  | 67.31  | 56.17  | 63.23  | 91.32  | 43.99  | 75.62  | 55.45  | 146.72 | 137.56 |
| Sm      | 35.28  | 96.66  | 98.13  | 86.68  | 14.68  | 75.07  | 19.47  | 14.90  | 7.63   | 14.78  | 12.82  | 14.10  | 25.71  | 9.11   | 17.32  | 15.51  | 34.90  | 31.12  |
| Eu      | 16.55  | 18.97  | 23.39  | 15.12  | 8.44   | 17.85  | 13.70  | 9.40   | 7.27   | 11.34  | 7.84   | 9.11   | 11.18  | 7.50   | 8.91   | 7.72   | 11.35  | 11.64  |
| Gd      | 35.33  | 121.32 | 127.75 | 106.28 | 13.82  | 91.01  | 20.52  | 14.56  | 6.77   | 14.45  | 11.95  | 13.90  | 29.27  | 8.22   | 17.18  | 17.47  | 33.15  | 28.40  |
| Tb      | 8.50   | 25.92  | 26.63  | 21.61  | 3.14   | 19.41  | 4.08   | 2.88   | 1.42   | 2.87   | 2.33   | 2.72   | 5.41   | 1.63   | 3.53   | 3.36   | 6.32   | 5.71   |
| Dy      | 69.59  | 192.93 | 198.23 | 157.81 | 27.95  | 147.49 | 26.64  | 18.67  | 9.81   | 19.25  | 15.34  | 18.11  | 33.51  | 10.69  | 23.34  | 20.89  | 38.77  | 37.53  |
| Ho      | 15.50  | 39.04  | 41.14  | 31.31  | 6.94   | 31.59  | 5.43   | 3.88   | 2.14   | 4.17   | 3.18   | 3.86   | 6.86   | 2.34   | 4.80   | 4.22   | 7.75   | 7.97   |
| Er      | 52.50  | 108.34 | 114.75 | 87.11  | 28.43  | 90.95  | 14.67  | 10.91  | 6.88   | 12.19  | 9.07   | 11.17  | 17.05  | 7.11   | 13.88  | 11.58  | 19.95  | 22.14  |
| Tm      | 7.98   | 13.00  | 13.70  | 10.51  | 5.57   | 12.04  | 2.16   | 1.86   | 1.28   | 2.16   | 1.62   | 1.86   | 2.23   | 1.34   | 2.36   | 1.97   | 2.71   | 3.22   |
| Yb      | 49.87  | 70.19  | 74.48  | 64.86  | 50.64  | 76.39  | 14.63  | 15.30  | 10.83  | 16.91  | 13.65  | 15.49  | 15.83  | 12.66  | 19.09  | 16.98  | 15.87  | 19.26  |
| Lu      | 5.39   | 7.04   | 7.91   | 6.93   | 7.65   | 8.53   | 1.96   | 2.16   | 1.56   | 2.41   | 1.98   | 2.26   | 2.06   | 2.03   | 2.66   | 2.67   | 2.11   | 2.39   |
| Ta      | 6.71   | 7.22   | 7.46   | 8.89   | 8.52   | 9.38   | 9.33   | 9.04   | 9.40   | 9.34   | 9.72   | 9.77   | 9.86   | 9.78   | 9.94   | 10.57  | 7.92   | 8.17   |

|         |        |         |         |         |        |         |        |        |        |        |        |        |        |        |        |        |        |        |
|---------|--------|---------|---------|---------|--------|---------|--------|--------|--------|--------|--------|--------|--------|--------|--------|--------|--------|--------|
| ΣREE    | 909.80 | 1391.06 | 1453.79 | 1557.59 | 438.70 | 1567.81 | 418.73 | 397.36 | 334.80 | 437.59 | 378.03 | 397.76 | 454.31 | 319.18 | 493.58 | 421.01 | 745.93 | 782.93 |
| LaN/YbN | 699.04 | 2144.15 | 2216.90 | 1900.42 | 282.02 | 1636.60 | 395.76 | 291.63 | 142.31 | 289.36 | 245.07 | 277.19 | 543.16 | 171.34 | 341.55 | 325.93 | 673.47 | 588.63 |
| δEu     | 1.42   | 0.54    | 0.64    | 0.48    | 1.79   | 0.66    | 2.08   | 1.93   | 3.03   | 2.35   | 1.91   | 1.97   | 1.24   | 2.60   | 1.56   | 1.43   | 1.01   | 1.18   |

Continued Table 1

| Element | DHT198 |        |        |        |        |        |        |        |         | DHT202 |        |        |        |        |        |        |        |        |  |
|---------|--------|--------|--------|--------|--------|--------|--------|--------|---------|--------|--------|--------|--------|--------|--------|--------|--------|--------|--|
|         | 3      | 4      | 5      | 6      | 7      | 8      | 9      | 10     | 1       | 2      | 3      | 4      | 5      | 6      | 7      | 8      | 9      | 10     |  |
| Ti      | --     | 0.51   | 0.38   | --     | --     | 0.30   | 0.18   | 0.73   | 31.65   | 0.19   | 0.63   | 0.68   | 0.75   | --     | 0.10   | --     | 0.20   | 0.29   |  |
| Sr      | 289.77 | 356.38 | 182.41 | 369.23 | 216.84 | 274.81 | 191.87 | 283.14 | 159.42  | 189.28 | 155.95 | 76.74  | 53.21  | 169.47 | 29.31  | 185.20 | 161.29 | 192.93 |  |
| Y       | 185.78 | 156.88 | 255.49 | 166.71 | 186.56 | 227.15 | 234.71 | 230.18 | 185.34  | 74.33  | 214.71 | 622.05 | 724.72 | 326.02 | 876.26 | 165.45 | 190.38 | 346.95 |  |
| Nb      | 3.49   | 3.96   | 5.56   | 3.82   | 4.39   | 3.57   | 4.13   | 3.79   | 19.41   | 9.33   | 20.00  | 149.28 | 145.10 | 50.54  | 111.71 | 14.87  | 24.25  | 27.87  |  |
| Mo      | 145.21 | 129.60 | 133.86 | 133.34 | 137.80 | 149.82 | 143.02 | 145.11 | 68.06   | 84.54  | 95.69  | 28.76  | 42.40  | 82.48  | 68.80  | 96.24  | 94.72  | 102.55 |  |
| Ba      | 0.10   | 0.05   | 0.05   | 0.06   | 0.02   | 0.05   | 0.11   | 0.14   | 0.06    | <0.011 | 0.03   | 0.05   | 0.02   | 0.06   | 0.08   | 0.02   | 0.02   | 0.05   |  |
| La      | 120.68 | 98.56  | 109.16 | 103.40 | 95.05  | 122.21 | 109.89 | 124.02 | 787.42  | 125.71 | 227.67 | 99.54  | 120.78 | 335.44 | 103.87 | 235.75 | 315.19 | 444.19 |  |
| Ce      | 309.60 | 291.25 | 294.16 | 245.75 | 255.72 | 409.60 | 331.53 | 400.69 | 1234.60 | 181.02 | 344.31 | 367.22 | 436.75 | 660.60 | 365.85 | 348.94 | 456.65 | 726.69 |  |
| Pr      | 38.48  | 44.08  | 37.67  | 28.36  | 33.29  | 65.89  | 49.72  | 63.98  | 98.26   | 14.17  | 32.47  | 63.06  | 72.42  | 69.13  | 62.61  | 26.64  | 35.50  | 64.25  |  |
| Nd      | 145.05 | 221.08 | 150.65 | 105.19 | 134.55 | 329.71 | 231.80 | 329.86 | 264.77  | 35.49  | 107.02 | 348.53 | 393.34 | 230.87 | 337.16 | 63.91  | 87.91  | 190.98 |  |
| Sm      | 31.79  | 54.19  | 36.84  | 23.85  | 32.63  | 79.35  | 58.55  | 81.94  | 40.79   | 6.15   | 20.89  | 124.64 | 132.27 | 50.82  | 116.93 | 10.25  | 14.60  | 38.35  |  |
| Eu      | 11.19  | 11.32  | 15.39  | 13.90  | 12.39  | 20.15  | 15.86  | 21.33  | 13.89   | 6.03   | 14.18  | 7.49   | 6.46   | 22.24  | 6.04   | 12.97  | 10.83  | 20.39  |  |
| Gd      | 29.83  | 53.41  | 36.50  | 22.48  | 30.79  | 77.30  | 56.22  | 79.96  | 28.78   | 4.75   | 17.09  | 149.16 | 161.59 | 41.40  | 147.53 | 8.04   | 10.54  | 31.89  |  |
| Tb      | 5.98   | 8.80   | 7.42   | 4.72   | 6.12   | 12.75  | 10.37  | 12.94  | 5.15    | 0.95   | 3.08   | 27.46  | 30.34  | 8.30   | 29.73  | 1.60   | 2.12   | 6.24   |  |
| Dy      | 38.44  | 52.07  | 49.62  | 30.22  | 39.16  | 75.24  | 61.51  | 75.28  | 30.28   | 6.12   | 19.50  | 165.73 | 188.64 | 50.64  | 199.11 | 10.67  | 13.57  | 39.70  |  |
| Ho      | 7.98   | 10.26  | 10.51  | 6.56   | 7.79   | 14.90  | 12.33  | 14.80  | 5.70    | 1.33   | 4.14   | 31.75  | 38.15  | 9.95   | 43.61  | 2.35   | 2.90   | 8.30   |  |
| Er      | 22.23  | 23.97  | 30.18  | 18.58  | 21.68  | 35.20  | 30.46  | 34.77  | 15.19   | 4.26   | 12.97  | 75.70  | 91.89  | 26.82  | 113.11 | 7.96   | 9.29   | 25.44  |  |
| Tm      | 2.94   | 2.85   | 4.52   | 3.03   | 3.15   | 3.97   | 3.82   | 3.97   | 2.59    | 0.87   | 2.55   | 9.05   | 10.61  | 4.14   | 13.35  | 1.76   | 2.04   | 4.47   |  |
| Yb      | 17.04  | 15.39  | 28.22  | 18.64  | 19.51  | 20.03  | 22.29  | 21.26  | 18.33   | 6.79   | 22.81  | 48.11  | 57.07  | 26.83  | 68.51  | 15.51  | 17.22  | 35.02  |  |

|         |        |         |        |        |        |         |         |         |         |        |        |         |         |         |         |        |        |         |
|---------|--------|---------|--------|--------|--------|---------|---------|---------|---------|--------|--------|---------|---------|---------|---------|--------|--------|---------|
| Lu      | 2.07   | 1.71    | 3.49   | 2.40   | 2.38   | 2.33    | 2.83    | 2.62    | 2.37    | 0.96   | 3.20   | 4.82    | 5.97    | 3.02    | 7.49    | 1.95   | 2.23   | 4.16    |
| Ta      | 8.69   | 8.75    | 9.01   | 9.45   | 9.06   | 9.18    | 9.73    | 9.19    | 9.06    | 9.02   | 9.62   | 12.73   | 12.40   | 11.90   | 11.21   | 9.98   | 10.54  | 11.01   |
| ΣREE    | 783.30 | 888.94  | 814.33 | 627.08 | 694.21 | 1268.63 | 997.18  | 1267.40 | 2548.10 | 394.60 | 831.88 | 1522.26 | 1746.28 | 1540.20 | 1614.90 | 748.30 | 980.59 | 1640.07 |
| LaN/YbN | 609.73 | 1065.21 | 726.06 | 458.47 | 627.59 | 1550.70 | 1136.00 | 1602.70 | 678.40  | 107.02 | 374.10 | 2699.73 | 2894.70 | 908.20  | 2600.57 | 179.74 | 245.62 | 692.43  |
| δEu     | 1.09   | 0.64    | 1.27   | 1.81   | 1.18   | 0.78    | 0.83    | 0.81    | 1.18    | 3.29   | 2.23   | 0.17    | 0.13    | 1.44    | 0.14    | 4.22   | 2.55   | 1.73    |

Continued Table 1

| Element | DHT202 |        | DHT204  |        |        |        |        |        |        |        |        |        | DHT231 |        |       |        |         |         |
|---------|--------|--------|---------|--------|--------|--------|--------|--------|--------|--------|--------|--------|--------|--------|-------|--------|---------|---------|
|         | 11     | 12     | 1       | 2      | 3      | 4      | 5      | 6      | 7      | 8      | 9      | 10     | 1      | 2      | 3     | 4      | 5       | 6       |
| Ti      | --     | 0.34   | 0.14    | 0.24   | 0.18   | --     | 0.38   | 0.13   | 0.42   | 0.09   | --     | 0.32   | 1.98   | 1.23   | 0.17  | --     | 0.08    | --      |
| Sr      | 198.37 | 35.27  | 144.75  | 168.09 | 174.13 | 156.29 | 173.02 | 159.24 | 124.53 | 198.67 | 195.28 | 178.17 | 105.89 | 106.65 | 88.21 | 408.87 | 1437.51 | 1519.24 |
| Y       | 292.93 | 730.99 | 165.58  | 143.67 | 104.00 | 163.98 | 196.17 | 128.60 | 181.06 | 140.47 | 133.84 | 113.02 | 11.47  | 19.99  | 19.37 | 112.82 | 100.48  | 63.15   |
| Nb      | 26.79  | 113.43 | 10.48   | 8.10   | 9.20   | 13.44  | 29.75  | 18.84  | 34.44  | 15.10  | 14.98  | 19.12  | 63.05  | 42.64  | 32.23 | 45.45  | 17.19   | 11.09   |
| Mo      | 86.14  | 65.81  | 89.61   | 93.62  | 94.86  | 90.02  | 87.03  | 89.55  | 68.80  | 98.51  | 92.74  | 78.60  | 4.09   | 7.84   | 0.52  | 1.05   | 0.95    | 0.41    |
| Ba      | 0.01   | 0.01   | <0.0102 | 0.03   | 0.02   | <0.012 | 0.06   | <0.009 | 0.02   | <0.007 | 0.04   | 0.03   | 0.07   | 0.06   | 0.02  | 0.10   | 0.11    | 0.11    |
| La      | 297.11 | 88.30  | 206.62  | 211.67 | 140.98 | 301.05 | 280.84 | 164.90 | 143.31 | 305.76 | 244.12 | 165.17 | 28.56  | 12.66  | 48.70 | 70.76  | 83.29   | 83.39   |
| Ce      | 546.73 | 347.36 | 213.49  | 200.37 | 165.60 | 318.26 | 422.45 | 251.80 | 270.52 | 468.25 | 392.47 | 274.83 | 27.69  | 26.56  | 87.81 | 105.78 | 100.52  | 82.99   |
| Pr      | 52.00  | 61.38  | 13.13   | 10.72  | 10.63  | 19.13  | 36.83  | 20.61  | 27.76  | 36.19  | 34.35  | 24.65  | 2.29   | 2.66   | 6.81  | 8.91   | 7.41    | 4.81    |
| Nd      | 163.20 | 340.28 | 26.27   | 19.79  | 21.76  | 38.77  | 106.98 | 55.28  | 86.59  | 85.86  | 93.70  | 70.81  | 6.71   | 8.40   | 15.51 | 23.44  | 19.75   | 9.34    |
| Sm      | 34.66  | 118.55 | 3.97    | 2.98   | 3.35   | 5.54   | 22.66  | 11.10  | 17.84  | 13.62  | 17.40  | 12.89  | 1.65   | 2.02   | 2.80  | 8.69   | 5.94    | 2.40    |
| Eu      | 26.73  | 5.32   | 12.19   | 11.77  | 7.56   | 9.71   | 13.63  | 7.17   | 10.42  | 10.71  | 10.39  | 8.71   | 1.89   | 1.68   | 3.73  | 10.27  | 7.77    | 6.35    |
| Gd      | 29.69  | 147.15 | 3.40    | 2.64   | 2.50   | 4.19   | 17.27  | 8.52   | 14.43  | 9.55   | 12.60  | 10.85  | 1.41   | 2.05   | 2.29  | 10.74  | 6.94    | 2.87    |
| Tb      | 5.81   | 28.52  | 0.79    | 0.61   | 0.58   | 1.00   | 3.89   | 1.76   | 3.06   | 1.90   | 2.40   | 2.01   | 0.30   | 0.53   | 0.54  | 3.25   | 1.76    | 0.81    |
| Dy      | 37.28  | 184.23 | 5.99    | 5.03   | 4.28   | 7.42   | 25.25  | 11.68  | 20.12  | 12.32  | 14.96  | 13.24  | 2.25   | 4.12   | 4.12  | 24.15  | 12.01   | 6.04    |
| Ho      | 7.55   | 38.44  | 1.49    | 1.26   | 1.09   | 1.83   | 4.91   | 2.40   | 4.13   | 2.52   | 2.99   | 2.74   | 0.52   | 0.99   | 0.96  | 4.95   | 2.49    | 1.40    |
| Er      | 22.55  | 97.66  | 6.30    | 4.98   | 3.98   | 7.09   | 14.34  | 7.36   | 12.48  | 7.91   | 8.52   | 8.02   | 2.06   | 3.66   | 3.72  | 15.17  | 8.60    | 5.01    |

|                                  |         |         |        |        |        |        |        |        |        |        |        |        |       |       |        |        |        |        |
|----------------------------------|---------|---------|--------|--------|--------|--------|--------|--------|--------|--------|--------|--------|-------|-------|--------|--------|--------|--------|
| Tm                               | 3.96    | 11.31   | 1.74   | 1.52   | 1.01   | 1.66   | 2.45   | 1.49   | 2.28   | 1.52   | 1.58   | 1.32   | 0.54  | 0.90  | 0.83   | 2.78   | 1.91   | 1.28   |
| Yb                               | 27.21   | 56.03   | 19.70  | 16.51  | 10.52  | 16.41  | 16.43  | 11.51  | 17.50  | 12.35  | 11.32  | 10.32  | 6.01  | 8.43  | 7.83   | 19.10  | 17.87  | 14.77  |
| Lu                               | 3.28    | 6.04    | 2.96   | 2.55   | 1.43   | 2.25   | 1.94   | 1.37   | 2.29   | 1.47   | 1.42   | 1.28   | 0.93  | 1.28  | 1.07   | 2.09   | 2.55   | 2.34   |
| Ta                               | 10.69   | 10.88   | 8.67   | 8.84   | 9.26   | 9.78   | 10.20  | 9.86   | 10.83  | 9.99   | 9.58   | 9.58   | 9.27  | 9.16  | 8.93   | 9.06   | 8.56   | 8.64   |
| ΣREE                             | 1257.76 | 1530.57 | 518.04 | 492.40 | 375.27 | 734.31 | 969.87 | 556.95 | 632.73 | 969.93 | 848.22 | 606.84 | 82.81 | 75.94 | 186.72 | 310.08 | 278.81 | 223.80 |
| La <sub>N</sub> /Yb <sub>N</sub> | 635.16  | 2615.15 | 72.74  | 55.54  | 57.30  | 95.40  | 391.69 | 192.55 | 317.68 | 225.82 | 293.17 | 234.16 | 30.20 | 40.29 | 50.14  | 191.28 | 127.13 | 51.97  |
| δEu                              | 2.49    | 0.12    | 9.91   | 12.57  | 7.67   | 5.93   | 2.03   | 2.17   | 1.93   | 2.73   | 2.05   | 2.19   | 1.25  | 1.41  | 0.84   | 0.97   | 0.77   | 1.14   |

Continued  
Table 1

| Element | DHT231  |        | DHT233 |        |        |       |        | DHT241 |        |        |        |        |        |        |        |       |       |
|---------|---------|--------|--------|--------|--------|-------|--------|--------|--------|--------|--------|--------|--------|--------|--------|-------|-------|
|         | 7       | 1      | 2      | 3      | 4      | 1     | 2      | 3      | 4      | 5      | 6      | 7      | 8      | 9      | 10     | 11    | 12    |
| Ti      | --      | 1.25   | 2.73   | 2.98   | 0.44   | --    | 0.80   | 0.57   | 0.09   | 0.49   | --     | 1.00   | 0.20   | 1.18   | 0.34   | 7.99  | 1.22  |
| Sr      | 1581.63 | 139.52 | 153.97 | 152.25 | 200.79 | 99.70 | 106.51 | 122.47 | 179.20 | 158.77 | 185.41 | 175.05 | 153.04 | 177.17 | 142.91 | 98.39 | 94.51 |
| Y       | 48.87   | 38.08  | 34.38  | 30.38  | 30.44  | 17.49 | 23.92  | 13.75  | 4.86   | 3.75   | 3.80   | 5.94   | 4.50   | 3.18   | 2.72   | 1.45  | 2.88  |
| Nb      | 12.89   | 79.98  | 137.65 | 219.04 | 23.81  | 1.60  | 1.39   | 1.47   | 1.65   | 1.30   | 1.29   | 1.96   | 1.65   | 1.54   | 1.58   | 2.02  | 1.55  |
| Mo      | 1.23    | 1.14   | 1.11   | 1.54   | 6.84   | 2.77  | 3.76   | 0.81   | 0.97   | 0.61   | 0.39   | 2.21   | 1.31   | 0.73   | 1.49   | 2.69  | 3.01  |
| Ba      | 0.12    | 0.12   | 0.08   | 0.15   | 0.27   | 0.02  | 0.45   | 0.02   | 0.02   | 0.11   | 0.02   | 0.60   | 0.33   | 0.07   | 0.24   | 0.64  | 0.25  |
| La      | 65.72   | 76.34  | 101.60 | 109.66 | 39.89  | 23.96 | 28.27  | 18.16  | 25.11  | 15.10  | 15.24  | 25.41  | 16.02  | 19.05  | 9.99   | 2.84  | 4.75  |
| Ce      | 66.53   | 98.23  | 92.54  | 100.46 | 53.77  | 53.79 | 57.80  | 53.86  | 42.85  | 28.22  | 20.30  | 56.64  | 34.37  | 35.48  | 16.98  | 4.04  | 8.00  |
| Pr      | 4.02    | 6.89   | 5.84   | 6.04   | 4.14   | 6.34  | 6.30   | 7.72   | 4.00   | 2.84   | 1.57   | 6.23   | 3.64   | 3.17   | 1.64   | 0.42  | 0.87  |
| Nd      | 7.98    | 17.67  | 14.25  | 14.01  | 11.57  | 24.44 | 22.58  | 33.08  | 12.40  | 9.11   | 4.16   | 21.48  | 12.15  | 8.47   | 4.84   | 1.42  | 3.46  |
| Sm      | 2.25    | 2.90   | 2.23   | 2.10   | 1.73   | 5.67  | 5.39   | 8.34   | 1.75   | 1.46   | 0.58   | 3.80   | 2.30   | 1.24   | 0.91   | 0.34  | 0.83  |
| Eu      | 4.57    | 2.31   | 2.48   | 2.49   | 1.00   | 2.17  | 2.32   | 2.08   | 0.46   | 0.31   | 0.19   | 0.82   | 0.47   | 0.42   | 0.23   | 0.09  | 0.18  |
| Gd      | 2.83    | 2.88   | 2.33   | 2.03   | 2.34   | 4.70  | 4.46   | 6.36   | 1.01   | 0.90   | 0.40   | 2.52   | 1.56   | 0.63   | 0.72   | 0.27  | 0.67  |
| Tb      | 0.81    | 0.73   | 0.59   | 0.51   | 0.73   | 0.65  | 0.64   | 0.83   | 0.12   | 0.11   | 0.05   | 0.30   | 0.20   | 0.10   | 0.10   | 0.04  | 0.11  |

|                                  |        |        |        |        |        |        |        |        |       |       |       |        |       |       |       |      |       |
|----------------------------------|--------|--------|--------|--------|--------|--------|--------|--------|-------|-------|-------|--------|-------|-------|-------|------|-------|
| Dy                               | 5.92   | 6.35   | 4.95   | 4.64   | 6.70   | 3.06   | 3.35   | 3.67   | 0.56  | 0.48  | 0.23  | 1.30   | 0.89  | 0.54  | 0.40  | 0.17 | 0.42  |
| Ho                               | 1.31   | 1.58   | 1.28   | 1.20   | 1.73   | 0.44   | 0.58   | 0.50   | 0.09  | 0.08  | 0.05  | 0.19   | 0.13  | 0.09  | 0.07  | 0.03 | 0.08  |
| Er                               | 4.50   | 6.04   | 4.61   | 4.53   | 6.79   | 1.09   | 1.36   | 1.09   | 0.23  | 0.20  | 0.15  | 0.38   | 0.29  | 0.21  | 0.14  | 0.07 | 0.17  |
| Tm                               | 1.12   | 1.32   | 1.04   | 1.07   | 1.54   | 0.18   | 0.19   | 0.12   | 0.03  | 0.03  | 0.03  | 0.05   | 0.04  | 0.02  | 0.02  | 0.01 | 0.03  |
| Yb                               | 12.46  | 12.33  | 11.09  | 10.99  | 16.00  | 0.87   | 1.29   | 0.47   | 0.27  | 0.19  | 0.22  | 0.28   | 0.20  | 0.15  | 0.19  | 0.10 | 0.23  |
| Lu                               | 1.92   | 1.66   | 1.69   | 1.71   | 2.65   | 0.11   | 0.18   | 0.04   | 0.04  | 0.03  | 0.04  | 0.03   | 0.02  | 0.02  | 0.03  | 0.02 | 0.03  |
| Ta                               | 9.05   | 13.01  | 17.17  | 26.19  | 9.82   | 7.88   | 8.06   | 8.72   | 8.71  | 8.93  | 8.76  | 8.82   | 9.06  | 8.72  | 8.60  | 8.67 | 8.43  |
| ΣREE                             | 181.94 | 237.23 | 246.52 | 261.44 | 150.58 | 127.47 | 134.70 | 136.32 | 88.91 | 59.07 | 43.19 | 119.43 | 72.28 | 69.59 | 36.26 | 9.88 | 19.82 |
| La <sub>N</sub> /Yb <sub>N</sub> | 49.96  | 57.22  | 45.13  | 40.88  | 39.84  | 102.21 | 97.08  | 144.20 | 26.32 | 22.70 | 9.45  | 61.27  | 37.51 | 17.43 | 16.03 | 6.08 | 14.77 |
| δEu                              | 0.76   | 0.72   | 1.29   | 0.84   | 0.84   | 0.72   | 3.70   | 2.50   | 4.38  | 3.25  | 3.69  | 7.39   | 5.54  | 2.42  | 3.30  | 3.64 | 1.52  |

---

-- Below detection limit.
